# Supplementary material for: TAD-free analysis of architectural proteins and insulators
Source: PubMed Central journal article supplement — Nucleic Acids Res. 2017 Dec 19;46(5):e27. doi: 10.1093/nar/gkx1246 (PMC5861416; doi:10.1093/nar/gkx1246), 2017-12-19
Supplement: gkx1246_supp.pdf [file gkx1246_supp.pdf]

## Supplementary Data

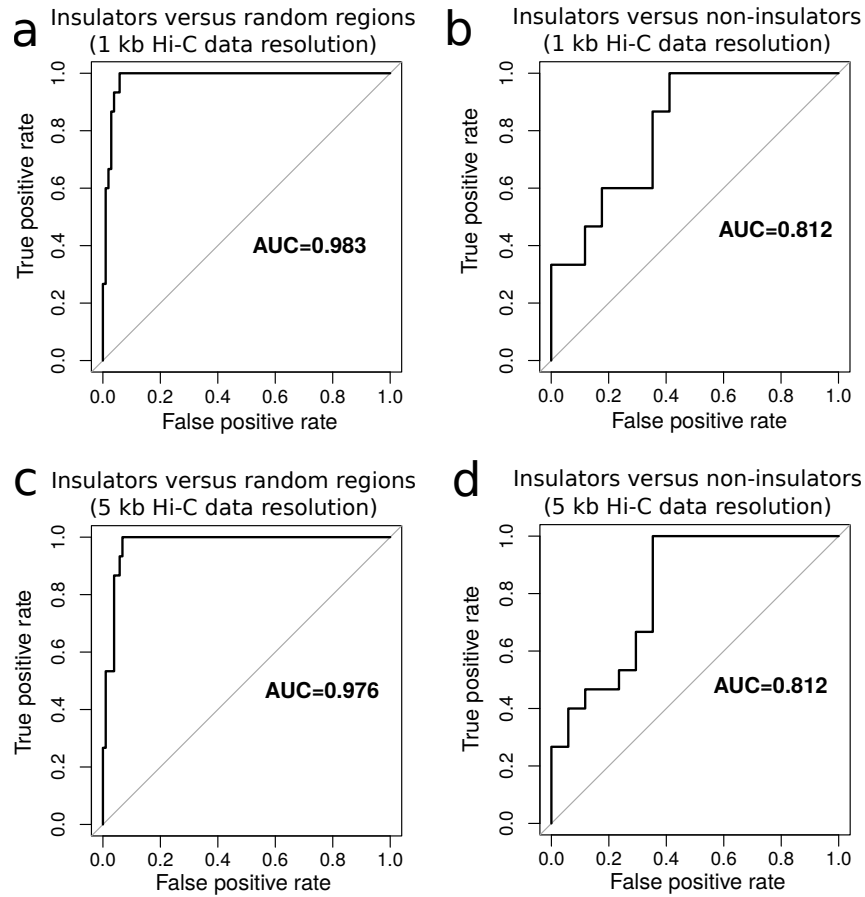

Figure S1: Predictions of enhancer-blocking assays for 1 and 5 kb resolutions. a) Receiver operating characteristic (ROC) curves of the prediction of insulating regions (positives) as compared to randomly drawn regions (negatives) at 1 kb resolution. Area under the ROC curve (AUC) is plotted. b) ROC curves of the prediction of insulating regions (positives) as compared to non-insulating regions (negatives) at 1 kb resolution. c) ROC curves of the prediction of insulating regions (positives) as compared to randomly drawn regions (negatives) at 5 kb resolution. d) ROC curves of the prediction of insulating regions (positives) as compared to non-insulating regions (negatives) at 5 kb resolution.

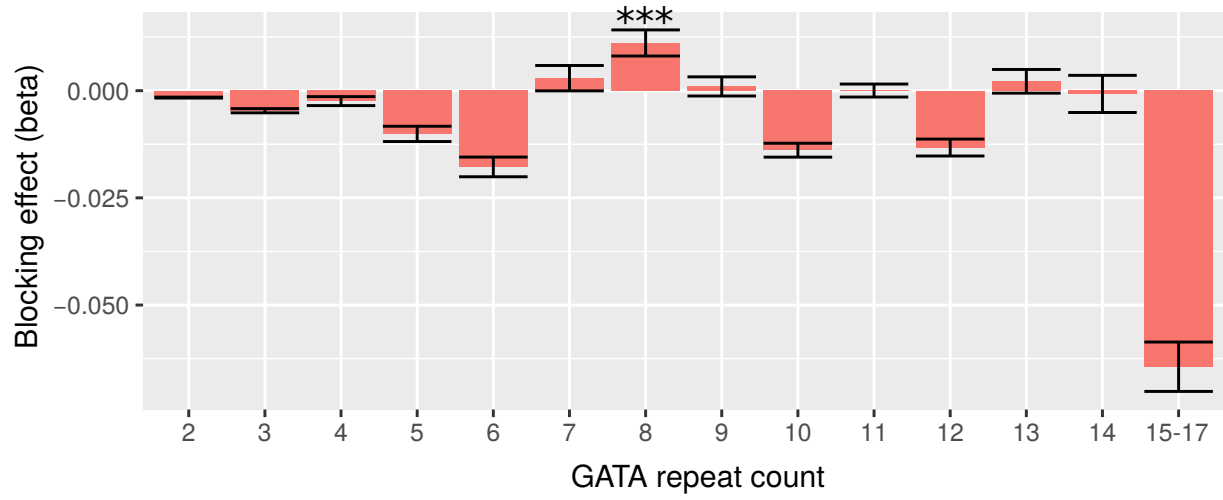

Figure S2: Blocking effects of GATA simple sequence repeats depending on the repeat count in human at 10 kb resolution and for 950-1000 kb distances.

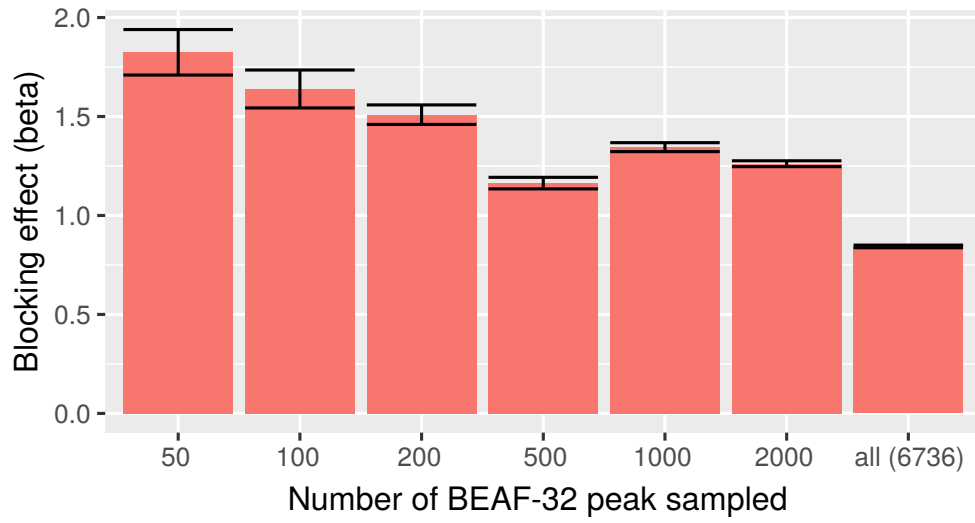

Figure S3: Blocking effect of BEAF-32 depending on the number of sampled ChIP-seq peaks. Analysis at 2 kb resolution in *Drosophila*.

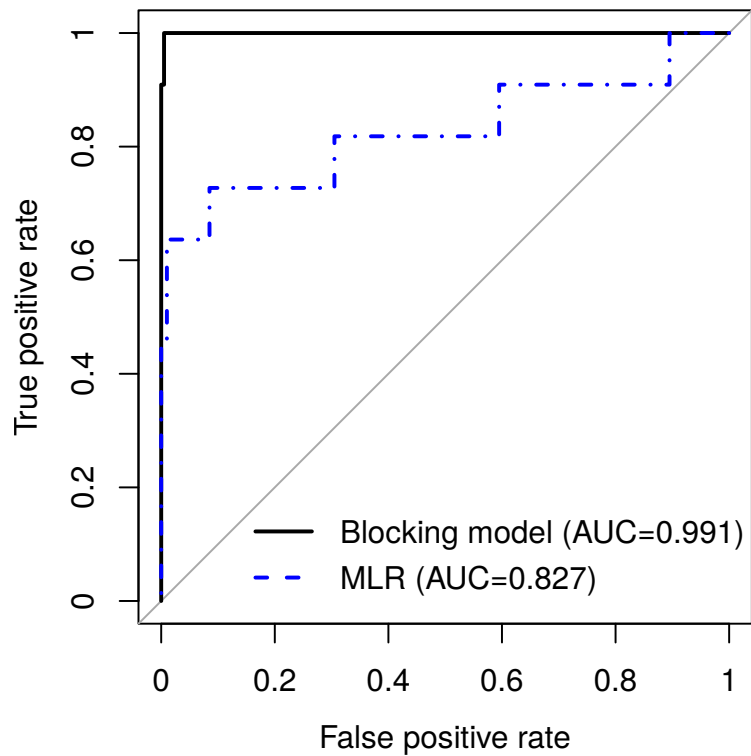

Figure S4: Receiver operating characteristic (ROC) curves of multiple logistic regression (MLR) and the blocking model to distinguish between known protein peaks (11 true positives) and random peaks (200 false positives). Absolute values of model betas are used to assess the effect of proteins on long-range contacts.

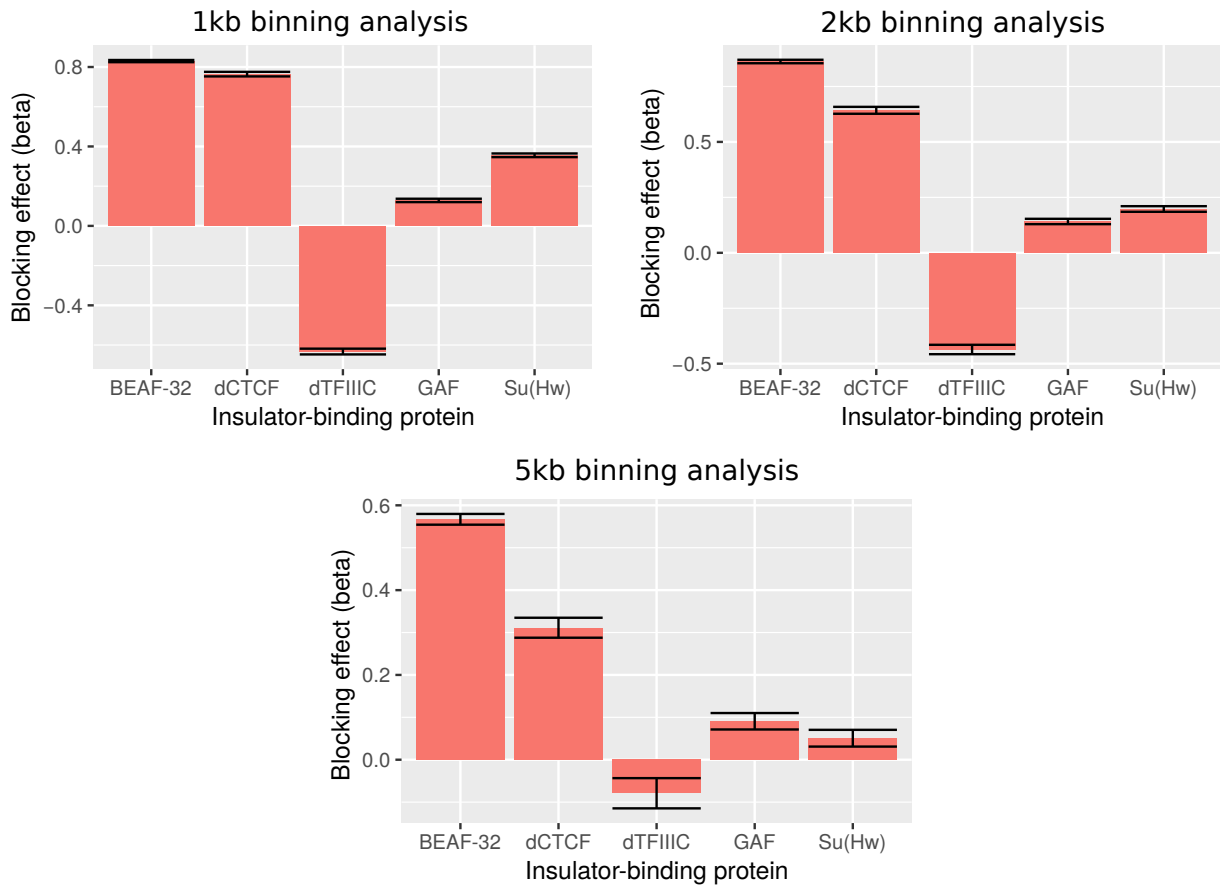

Figure S5: Blocking effects of insulator-binding proteins (IBPs) for different binning resolutions in *Drosophila*.

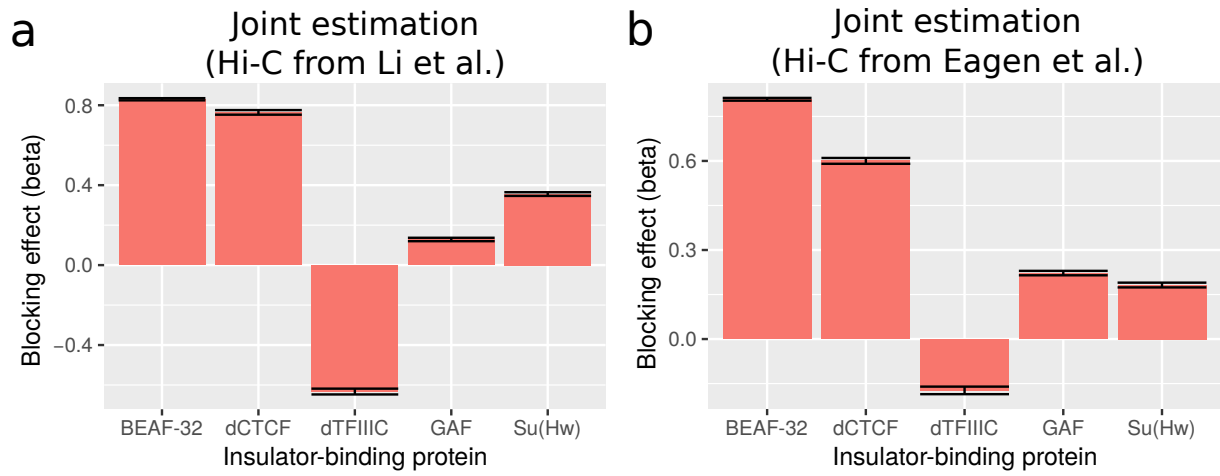

Figure S6: Blocking effects of insulator-binding proteins (IBPs) in *Drosophila* estimated from two different Hi-C data.

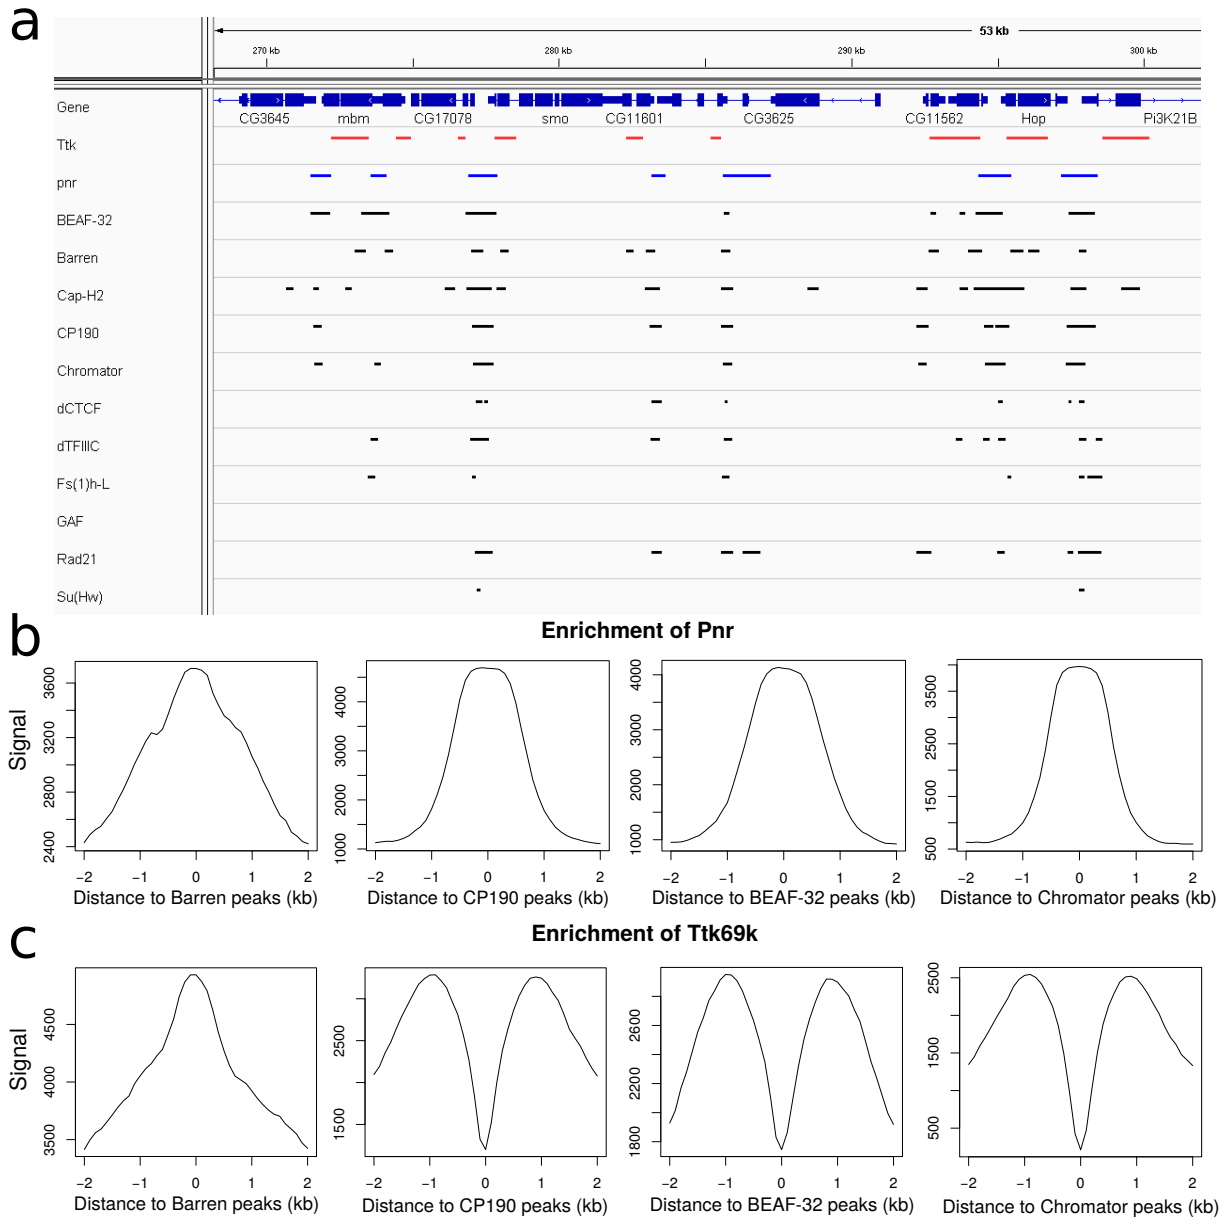

Figure S7: Colocalization of Pnr and Ttk69k with known architectural proteins. a) A genome browser view of Pnr and Ttk69k with known architectural proteins. b) Enrichment of Pnr at architectural protein peaks. c) Enrichment of Ttk69k at architectural protein peaks.

| <b>GATA repeat number</b> | <b>Beta</b> | <b>Standard Error</b> | <b>Z</b> | <b>p value</b>        |
|---------------------------|-------------|-----------------------|----------|-----------------------|
| 2                         | -0.006      | 0.0006                | -10.55   | 4.91647830317279E-26  |
| 3                         | -0.055      | 0.0024                | -22.73   | 2.06620518209449E-114 |
| 4                         | -0.024      | 0.0055                | -4.43    | 9.33034970015101E-06  |
| 5-6                       | 0.046       | 0.0081                | 5.65     | 1.57778907988474E-08  |
| 7-8                       | -0.008      | 0.0119                | -0.70    | 0.4827496909          |
| 11-123                    | 0.011       | 0.0100                | 1.13     | 0.2577483348          |

Table S1: Model betas of *Drosophila* GATA simple sequence repeats. Analysis at 2 kb resolution and for 20-50 kb distances.



| GATA repeat number | Beta  | Standard Error       | Z      | p value               |
|--------------------|-------|----------------------|--------|-----------------------|
| 2                  | 0.013 | 8.86318829244965E-05 | 151.06 | 0                     |
| 3                  | 0.033 | 0.0003557116         | 93.38  | 0                     |
| 4                  | 0.038 | 0.0007036716         | 53.44  | 0                     |
| 5                  | 0.025 | 0.0011539619         | 21.27  | 1.9932908536974E-100  |
| 6                  | 0.053 | 0.0014713421         | 35.70  | 4.55723899622072E-279 |
| 7                  | 0.062 | 0.0018601317         | 33.44  | 3.45842495063154E-245 |
| 8                  | 0.050 | 0.0019257774         | 25.85  | 2.66472092373179E-147 |
| 9                  | 0.074 | 0.0014512988         | 51.01  | 0                     |
| 10                 | 0.071 | 0.0010661896         | 66.39  | 0                     |
| 11                 | 0.046 | 0.0009956774         | 46.18  | 0                     |
| 12                 | 0.038 | 0.0012535064         | 30.65  | 2.36704007855988E-206 |
| 13                 | 0.042 | 0.0017541144         | 24.22  | 1.39923117425355E-129 |
| 14                 | 0.047 | 0.0027698068         | 17.00  | 7.849994668352E-65    |
| 15-17              | 0.043 | 0.0037149771         | 11.67  | 1.86443740955706E-31  |

Table S2: Model betas of human GATA simple sequence repeats. Analysis at 10 kb resolution and for 100-250 kb distances.

| GATA repeat number | Beta   | Standard Error       | Z      | p value               |
|--------------------|--------|----------------------|--------|-----------------------|
| 2                  | -0.002 | 5.46123852711819E-05 | -29.50 | 3.24053288057492E-191 |
| 3                  | -0.005 | 0.000250176          | -18.70 | 5.16881150444874E-78  |
| 4                  | -0.002 | 0.0005330809         | -4.56  | 5.10349653458264E-06  |
| 5                  | -0.010 | 0.0009108193         | -11.07 | 1.82889335537025E-28  |
| 6                  | -0.018 | 0.0011700824         | -15.20 | 3.5455797976855E-52   |
| 7                  | 0.003  | 0.0015092428         | 1.93   | 0.0537410863          |
| 8                  | 0.011  | 0.0015526436         | 7.17   | 7.51336216846802E-13  |
| 9                  | 0.001  | 0.001139641          | 0.87   | 0.3836339734          |
| 10                 | -0.014 | 0.0008266659         | -16.80 | 2.61447113005679E-63  |
| 11                 | 0.000  | 0.0007720696         | 0.04   | 0.9681702841          |
| 12                 | -0.013 | 0.0010067703         | -13.18 | 1.22115259786018E-39  |
| 13                 | 0.002  | 0.0014072903         | 1.55   | 0.1206247202          |
| 14                 | -0.001 | 0.0022085452         | -0.34  | 0.7314923455          |
| 15-17              | -0.064 | 0.0029390948         | -21.91 | 2.12936688286524E-106 |

Table S3: Model betas of human GATA simple sequence repeats. Analysis at 10 kb resolution and for 950-1000 kb distances.

| Name       | JASPAR code | Beta  | Known Architectural Protein | Abundance | Name     | JASPAR code | Beta  | Known Architectural Protein | Abundance | Name    | JASPAR code | Beta  | Known Architectural Protein | Abundance |
|------------|-------------|-------|-----------------------------|-----------|----------|-------------|-------|-----------------------------|-----------|---------|-------------|-------|-----------------------------|-----------|
| abd-A      | MA0206.1    | -0.24 | No                          | 8885      | dve      | MA0915.1    | 0.22  | No                          | 1741      | ovo     | MA0126.1    | 0.13  | No                          | 3199      |
| Abd-B      | MA0165.1    | -0.07 | No                          | 11554     | E5       | MA0189.1    | 0.27  | No                          | 8208      | pan     | MA0237.2    | 0.08  | No                          | 5906      |
| achi       | MA0207.1    | -0.47 | No                          | 3416      | Ecr::usp | MA0534.1    | -0.30 | No                          | 5468      | pb      | MA0238.1    | 0.12  | No                          | 9864      |
| ai         | MA0208.1    | 0.00  | No                          | 6545      | Eip74EF  | MA0026.1    | -0.06 | No                          | 3092      | PHDP    | MA0457.1    | 0.32  | No                          | 12824     |
| Antp       | MA0166.1    | -0.09 | No                          | 7400      | Elba     | MA0220.1    | 0.27  | No                          | 3424      | Pita    | MA0200.1    | 0.63  | No                          | 1537      |
| ap         | MA0209.1    | -0.19 | No                          | 9148      | ems      | MA0219.1    | 0.00  | No                          | 7856      | pnr     | MA0536.1    | 0.59  | No                          | 7803      |
| ara        | MA0210.1    | -0.19 | No                          | 8468      | en       | MA0220.1    | 0.37  | No                          | 10990     | Pph13   | MA0200.1    | -0.11 | No                          | 9845      |
| Awh        | MA0167.1    | -0.19 | No                          | 10170     | Ets21C   | MA0916.1    | -0.60 | No                          | 1401      | prd     | MA0239.1    | 0.01  | No                          | 3199      |
| bap        | MA0211.1    | 0.14  | No                          | 3223      | eve      | MA0221.1    | -0.40 | No                          | 7601      | Ptx1    | MA0201.1    | -0.34 | No                          | 1245      |
| bcd        | MA0212.1    | 0.65  | No                          | 2331      | exd      | MA0222.1    | 0.09  | No                          | 4231      | repo    | MA0240.1    | -0.03 | No                          | 8556      |
| BEAF-32    |             | 0.13  | Yes                         | 5936      | exex     | MA0224.1    | 0.18  | No                          | 8491      | ro      | MA0241.1    | -0.05 | No                          | 7743      |
| Bgb::run   | MA0242.1    | -0.14 | No                          | 4664      | fkh      | MA0446.1    | -0.25 | No                          | 11272     | Rx      | MA0202.1    | 0.18  | No                          | 10752     |
| B-H1       | MA0168.1    | 0.00  | No                          | 8596      | ftz      | MA0225.1    | -0.14 | No                          | 10538     | schlank | MA0193.1    | 0.00  | No                          | 3237      |
| B-H2       | MA0169.1    | 0.03  | No                          | 9021      | GAF      | MA0225.1    | 0.01  | Yes                         | 10367     | Scr     | MA0203.1    | 0.51  | No                          | 6504      |
| brk        | MA0213.1    | 0.43  | No                          | 2911      | gcm2     | MA0917.1    | -0.46 | No                          | 1522      | sd      | MA0243.1    | -0.15 | No                          | 5076      |
| br         | MA0010.1    | -0.06 | No                          | 20321     | Gsc      | MA0190.1    | -0.69 | No                          | 2437      | Six4    | MA0204.1    | -0.08 | No                          | 2543      |
| br(var.2)  | MA0011.1    | 0.23  | No                          | 7265      | gt       | MA0447.1    | 0.05  | No                          | 1956      | silbo   | MA0244.1    | -0.06 | No                          | 6651      |
| br(var.3)  | MA0012.1    | 0.33  | No                          | 12334     | H2.0     | MA0448.1    | 0.14  | No                          | 12408     | siou    | MA0245.1    | 0.20  | No                          | 9559      |
| br(var.4)  | MA0013.1    | 0.11  | No                          | 16448     | hb       | MA0049.1    | -0.07 | No                          | 25953     | slp1    | MA0458.1    | -0.15 | No                          | 12539     |
| bsh        | MA0214.1    | 0.30  | No                          | 8328      | hbn      | MA0226.1    | 0.07  | No                          | 12245     | sna     | MA0086.1    | 0.48  | No                          | 2555      |
| btd        | MA0443.1    | -0.74 | No                          | 2956      | HGTX     | MA0191.1    | 0.01  | No                          | 11617     | so      | MA0246.1    | 0.22  | No                          | 2999      |
| btm        | MA0215.1    | -0.30 | No                          | 8928      | HHEX     | MA0183.1    | 0.28  | No                          | 9177      | Stat92E | MA0532.1    | -0.12 | No                          | 6115      |
| C15        | MA0170.1    | 0.15  | No                          | 10974     | hkb      | MA0450.1    | -0.04 | No                          | 2845      | Su(H)   | MA0085.1    | -0.21 | No                          | 3909      |
| cad        | MA0216.2    | -0.26 | No                          | 14203     | h        | MA0449.1    | -0.13 | No                          | 1568      | Su(Hw)  |             | 0.20  | Yes                         | 13929     |
| caup       | MA0217.1    | 0.29  | No                          | 6445      | Hmx      | MA0192.1    | 0.00  | No                          | 6450      | tin     | MA0247.2    | -0.34 | No                          | 4859      |
| Cf2        | MA0015.1    | -0.05 | No                          | 26370     | hth      | MA0227.1    | 0.10  | No                          | 3131      | tlf     | MA0459.1    | -0.12 | No                          | 9997      |
| CG11085    | MA0171.1    | 0.31  | No                          | 6260      | lbf      |             | 0.29  | No                          | 3586      | Trl     | MA0205.1    | 0.02  | No                          | 19732     |
| CG11294    | MA0172.1    | -0.08 | No                          | 6829      | ind      | MA0228.1    | -0.67 | No                          | 8848      | Ttk69k  |             | 0.55  | No                          | 3484      |
| CG11617    | MA0173.1    | 0.55  | No                          | 5032      | inv      | MA0229.1    | 0.00  | No                          | 7061      | tup     | MA0248.1    | -0.32 | No                          | 6848      |
| CG15696-RA | MA0176.1    | -0.15 | No                          | 12507     | kni      | MA0451.1    | -0.50 | No                          | 4231      | twi     | MA0249.1    | -0.28 | No                          | 4754      |
| CG18599    | MA0177.1    | 0.14  | No                          | 8900      | Kr       | MA0452.2    | -0.05 | No                          | 5099      | Ubx     | MA0094.2    | -0.24 | No                          | 8448      |
| CG32105    | MA0178.1    | 0.08  | No                          | 9392      | lab      | MA0230.1    | 0.28  | No                          | 8324      | unc-4   | MA0250.1    | -0.48 | No                          | 8658      |
| CG32532    | MA0179.1    | -0.04 | No                          | 11434     | lbe      | MA0231.1    | 0.05  | No                          | 6052      | unpg    | MA0251.1    | 0.17  | No                          | 11101     |
| CG34031    | MA0444.1    | 0.12  | No                          | 6329      | lbi      | MA0232.1    | -0.22 | No                          | 7255      | usp     | MA0016.1    | -0.38 | No                          | 1190      |
| CG4328-RA  | MA0182.1    | -0.12 | No                          | 12208     | Lim1     | MA0194.1    | 0.33  | No                          | 6147      | vis     | MA0252.1    | 0.60  | No                          | 3179      |
| CG9876     | MA0184.1    | 0.17  | No                          | 10078     | Lim3     | MA0195.1    | -0.47 | No                          | 9592      | vnd     | MA0253.1    | -0.03 | No                          | 6194      |
| cnc::maf-S | MA0530.1    | -0.44 | No                          | 4014      | lms      | MA0175.1    | -0.05 | No                          | 8975      | Vsx1    | MA0181.1    | -0.41 | No                          | 11108     |
| ct         | MA0218.1    | 0.09  | No                          | 5491      | M1BP     |             | 1.46  | No                          | 3646      | Vsx2    | MA0180.1    | 0.12  | No                          | 8443      |
| Dbx        | MA0174.1    | 0.17  | No                          | 12150     | Mad      | MA0535.1    | -0.16 | No                          | 4228      | vvl     | MA0254.1    | -0.06 | No                          | 6014      |
| dCTCF      |             | 0.32  | Yes                         | 4155      | mirr     | MA0233.1    | -0.02 | No                          | 9289      | Zelda   |             | -0.41 | No                          | 545       |
| Deaf1      | MA0185.1    | -0.29 | No                          | 5345      | NK7.1    | MA0196.1    | -0.14 | No                          | 9846      | zen2    | MA0257.1    | 0.00  | No                          | 9053      |
| Dfd        | MA0186.1    | 0.11  | No                          | 4208      | nub      | MA0197.2    | -0.07 | No                          | 16871     | zen     | MA0256.1    | -0.24 | No                          | 5867      |
| Dll        | MA0187.1    | 0.10  | No                          | 8537      | oc       | MA0234.1    | 0.00  | No                          | 2389      | ZIPIC   |             | -0.19 | No                          | 2351      |
| dl         | MA0022.1    | 0.00  | No                          | 4576      | odd      | MA0454.1    | -0.19 | No                          | 2383      | z       | MA0255.1    | -0.14 | No                          | 5137      |
| dl(var.2)  | MA0023.1    | -0.22 | No                          | 3210      | OdsH     | MA0198.1    | 0.21  | No                          | 10250     | ZW5     |             | 0.33  | Yes                         | 5252      |
| D          | MA0445.1    | -0.19 | No                          | 10471     | onecut   | MA0235.1    | 0.10  | No                          | 10962     |         |             |       |                             |           |
| DREF       |             | 0.07  | Yes                         | 8294      | opa      | MA0456.1    | -0.09 | No                          | 1370      |         |             |       |                             |           |
| Dr         | MA0188.1    | -0.16 | No                          | 4476      | Optix    | MA0199.1    | -0.06 | No                          | 4057      |         |             |       |                             |           |
| dTFIIIC    |             | -0.05 | Yes                         | 3767      | otp      | MA0236.1    | 0.20  | No                          | 10548     |         |             |       |                             |           |

Table S4: Model betas of *Drosophila* DNA-binding protein motifs learned using the blocking model with Poisson lasso.

| Name       | JASPAR code | Beta  | Known Architectural Protein | Abundance | Name     | JASPAR code | Beta  | Known Architectural Protein | Abundance | Name    | JASPAR code | Beta  | Known Architectural Protein | Abundance |  |
|------------|-------------|-------|-----------------------------|-----------|----------|-------------|-------|-----------------------------|-----------|---------|-------------|-------|-----------------------------|-----------|--|
| abd-A      | MA0206.1    | -0.71 | No                          | 8885      | dve      | MA0915.1    | 0.00  | No                          | 1741      | ovo     | MA0126.1    | 3.38  | No                          | 3199      |  |
| Abd-B      | MA0165.1    | 2.20  | No                          | 11554     | E5       | MA0189.1    | -0.22 | No                          | 8208      | pan     | MA0237.2    | 1.30  | No                          | 5906      |  |
| achi       | MA0207.1    | 4.38  | No                          | 3416      | Ecr::usp | MA0534.1    | 0.56  | No                          | 5468      | pb      | MA0238.1    | 3.13  | No                          | 9864      |  |
| ai         | MA0208.1    | 0.00  | No                          | 6545      | Eip74EF  | MA0026.1    | 6.52  | No                          | 3092      | PHDP    | MA0457.1    | 4.75  | No                          | 12824     |  |
| Antp       | MA0166.1    | -0.12 | No                          | 7400      | Elba     | MA0220.1    | 1.89  | No                          | 3424      | Pita    |             | 3.33  | No                          | 1537      |  |
| ap         | MA0209.1    | -0.79 | No                          | 9148      | ems      | MA0219.1    | -1.73 | No                          | 7856      | pnr     | MA0536.1    | 1.88  | No                          | 7803      |  |
| ara        | MA0210.1    | -0.80 | No                          | 8468      | en       | MA0220.1    | 0.77  | No                          | 10990     | Pph13   | MA0200.1    | 0.00  | No                          | 9845      |  |
| Awh        | MA0167.1    | 0.00  | No                          | 10170     | Ets21C   | MA0916.1    | 1.17  | No                          | 1401      | prd     | MA0239.1    | 0.00  | No                          | 3199      |  |
| bap        | MA0211.1    | 5.24  | No                          | 3223      | eve      | MA0221.1    | 0.00  | No                          | 7601      | Ptx1    | MA0201.1    | 0.52  | No                          | 1245      |  |
| bcd        | MA0212.1    | 2.42  | No                          | 2331      | exd      | MA0222.1    | 2.65  | No                          | 4231      | repo    | MA0240.1    | 0.00  | No                          | 8556      |  |
| BEAF-32    |             | 5.45  | Yes                         | 5936      | exex     | MA0224.1    | 0.57  | No                          | 8491      | ro      | MA0241.1    | -1.48 | No                          | 7743      |  |
| Bgb::run   | MA0242.1    | 0.93  | No                          | 4664      | fkh      | MA0446.1    | 0.77  | No                          | 11272     | Rx      | MA0202.1    | 0.00  | No                          | 10752     |  |
| B-H1       | MA0168.1    | 3.16  | No                          | 8596      | ftz      | MA0225.1    | 0.75  | No                          | 10538     | schlank | MA0193.1    | 6.88  | No                          | 3237      |  |
| B-H2       | MA0169.1    | 1.77  | No                          | 9021      | GAF      |             | 1.55  | Yes                         | 10367     | Scr     | MA0203.1    | 0.00  | No                          | 6504      |  |
| brk        | MA0213.1    | 2.96  | No                          | 2911      | gcm2     | MA0917.1    | 4.25  | No                          | 1522      | sd      | MA0243.1    | 2.28  | No                          | 5076      |  |
| br         | MA0010.1    | -0.02 | No                          | 20321     | Gsc      | MA0190.1    | 5.63  | No                          | 2437      | Six4    | MA0204.1    | 3.67  | No                          | 2543      |  |
| br(var.2)  | MA0011.1    | 2.54  | No                          | 7265      | gt       | MA0447.1    | 2.00  | No                          | 1956      | silbo   | MA0244.1    | 4.09  | No                          | 6651      |  |
| br(var.3)  | MA0012.1    | 1.61  | No                          | 12334     | H2.0     | MA0448.1    | 0.65  | No                          | 12408     | siou    | MA0245.1    | -2.31 | No                          | 9559      |  |
| br(var.4)  | MA0013.1    | 0.91  | No                          | 16448     | hb       | MA0049.1    | 1.06  | No                          | 25953     | slp1    | MA0458.1    | 1.88  | No                          | 12539     |  |
| bsh        | MA0214.1    | 0.00  | No                          | 8328      | hbn      | MA0226.1    | 0.00  | No                          | 12245     | sna     | MA0086.1    | 8.20  | No                          | 2555      |  |
| btd        | MA0443.1    | 2.34  | No                          | 2956      | HGTX     | MA0191.1    | 0.52  | No                          | 11617     | so      | MA0246.1    | 2.89  | No                          | 2999      |  |
| btn        | MA0215.1    | 0.89  | No                          | 8928      | HHEX     | MA0183.1    | 0.90  | No                          | 9177      | Stat92E | MA0532.1    | 1.11  | No                          | 6115      |  |
| C15        | MA0170.1    | 1.84  | No                          | 10974     | hkb      | MA0450.1    | 0.53  | No                          | 2845      | Su(H)   | MA0085.1    | 0.00  | No                          | 3909      |  |
| cad        | MA0216.2    | -0.06 | No                          | 14203     | h        | MA0449.1    | 1.11  | No                          | 1568      | Su(Hw)  |             | 3.48  | Yes                         | 13929     |  |
| caup       | MA0217.1    | 2.49  | No                          | 6445      | Hmx      | MA0192.1    | 0.00  | No                          | 6450      | tin     | MA0247.2    | 0.56  | No                          | 4859      |  |
| Cf2        | MA0015.1    | 0.52  | No                          | 26370     | hth      | MA0227.1    | 2.98  | No                          | 3131      | tlf     | MA0459.1    | 0.66  | No                          | 9997      |  |
| CG11085    | MA0171.1    | 1.88  | No                          | 6260      | lbf      |             | 4.29  | No                          | 3586      | Trl     | MA0205.1    | 0.20  | No                          | 19732     |  |
| CG11294    | MA0172.1    | 0.00  | No                          | 6829      | ind      | MA0228.1    | 1.02  | No                          | 8848      | Ttk69k  |             | 1.28  | No                          | 3484      |  |
| CG11617    | MA0173.1    | 3.73  | No                          | 5032      | inv      | MA0229.1    | -1.00 | No                          | 7061      | tup     | MA0248.1    | 0.50  | No                          | 6848      |  |
| CG15696-RA | MA0176.1    | -0.38 | No                          | 12507     | kni      | MA0451.1    | 1.59  | No                          | 4231      | twi     | MA0249.1    | 1.61  | No                          | 4754      |  |
| CG18599    | MA0177.1    | -0.79 | No                          | 8900      | Kr       | MA0452.2    | 0.00  | No                          | 5099      | Ubx     | MA0094.2    | 0.64  | No                          | 8448      |  |
| CG32105    | MA0178.1    | -2.12 | No                          | 9392      | lab      | MA0230.1    | 3.35  | No                          | 8324      | unc-4   | MA0250.1    | 0.00  | No                          | 8658      |  |
| CG32532    | MA0179.1    | 0.00  | No                          | 11434     | lbe      | MA0231.1    | 0.13  | No                          | 6052      | unpg    | MA0251.1    | 0.11  | No                          | 11101     |  |
| CG34031    | MA0444.1    | 0.00  | No                          | 6329      | lbi      | MA0232.1    | -3.22 | No                          | 7255      | usp     | MA0016.1    | 2.44  | No                          | 1190      |  |
| CG4328-RA  | MA0182.1    | 0.64  | No                          | 12208     | Lim1     | MA0194.1    | 0.00  | No                          | 6147      | vis     | MA0252.1    | 0.00  | No                          | 3179      |  |
| CG9876     | MA0184.1    | -0.57 | No                          | 10078     | Lim3     | MA0195.1    | -1.86 | No                          | 9592      | vnd     | MA0253.1    | 1.95  | No                          | 6194      |  |
| cnc::maf-S | MA0530.1    | 0.00  | No                          | 4014      | lms      | MA0175.1    | -0.48 | No                          | 8975      | Vsx1    | MA0181.1    | 0.00  | No                          | 11108     |  |
| ct         | MA0218.1    | 4.61  | No                          | 5491      | M1BP     |             | 8.65  | No                          | 3646      | Vsx2    | MA0180.1    | -0.44 | No                          | 8443      |  |
| Dbx        | MA0174.1    | 1.21  | No                          | 12150     | Mad      | MA0535.1    | 1.14  | No                          | 4228      | vvl     | MA0254.1    | 3.19  | No                          | 6014      |  |
| dCTCF      |             | 2.31  | Yes                         | 4155      | mirr     | MA0233.1    | 0.97  | No                          | 9289      | Zelda   |             | 9.32  | No                          | 545       |  |
| Deaf1      | MA0185.1    | 4.27  | No                          | 5345      | NK7.1    | MA0196.1    | -3.88 | No                          | 9846      | zen2    | MA0257.1    | 0.00  | No                          | 9053      |  |
| Dfd        | MA0186.1    | -0.21 | No                          | 4208      | nub      | MA0197.2    | 0.26  | No                          | 16871     | zen     | MA0256.1    | 0.22  | No                          | 5867      |  |
| Dll        | MA0187.1    | 1.45  | No                          | 8537      | oc       | MA0234.1    | 0.00  | No                          | 2389      | ZIPIC   |             | 6.54  | No                          | 2351      |  |
| dl         | MA0022.1    | 1.20  | No                          | 4576      | odd      | MA0454.1    | 0.85  | No                          | 2383      | z       | MA0255.1    | 2.55  | No                          | 5137      |  |
| dl(var.2)  | MA0023.1    | 2.10  | No                          | 3210      | OdsH     | MA0198.1    | 1.03  | No                          | 10250     | ZW5     |             | 7.79  | Yes                         | 5252.00   |  |
| D          | MA0445.1    | 0.95  | No                          | 10471     | onecut   | MA0235.1    | 6.86  | No                          | 10962     |         |             |       |                             |           |  |
| DREF       |             | -0.49 | Yes                         | 8294      | opa      | MA0456.1    | 0.84  | No                          | 1370      |         |             |       |                             |           |  |
| Dr         | MA0188.1    | 3.11  | No                          | 4476      | Optix    | MA0199.1    | 2.18  | No                          | 4057      |         |             |       |                             |           |  |
| dTFIIIC    |             | 4.68  | Yes                         | 3767      | otp      | MA0236.1    | -0.33 | No                          | 10548     |         |             |       |                             |           |  |

Table S5: Model betas of *Drosophila* DNA-binding protein motifs learned using multiple logistic regression with lasso.

| Interaction         | Beta  | Standard Error | Z      | p value      | Interaction          | Beta  | Standard Error | Z      | p value      |
|---------------------|-------|----------------|--------|--------------|----------------------|-------|----------------|--------|--------------|
| BEAF-32 x dCTCF     | -0.17 | 0.07           | -2.42  | 1.54E-02     | GAF x Barren         | 0.14  | 0.07           | 1.85   | 0.0649537846 |
| BEAF-32 x dTFIIIC   | -0.52 | 0.10           | -5.16  | 2.45E-07     | GAF x Cap-H2         | 0.68  | 0.11           | 6.37   | 1.87E-10     |
| BEAF-32 x GAF       | -0.40 | 0.05           | -7.86  | 3.76E-15     | GAF x Chromator      | -0.03 | 0.11           | -0.24  | 0.8104822049 |
| BEAF-32 x Su(Hw)    | 0.21  | 0.08           | 2.78   | 5.50E-03     | GAF x CP190          | 0.67  | 0.06           | 11.65  | 2.43E-31     |
| BEAF-32 x Barren    | -0.40 | 0.06           | -6.33  | 2.436121E-10 | GAF x Fs(1)h-L       | -0.34 | 0.07           | -5.09  | 3.52E-07     |
| BEAF-32 x Cap-H2    | 0.26  | 0.07           | 3.45   | 0.0005580305 | GAF x Rad21          | -0.06 | 0.01           | -5.34  | 9.20E-08     |
| BEAF-32 x Chromator | -2.32 | 0.04           | -58.87 | 0            | Su(Hw) x Barren      | 0.05  | 0.14           | 0.39   | 0.6981510779 |
| BEAF-32 x CP190     | 0.76  | 0.05           | 16.25  | 2.15E-59     | Su(Hw) x Cap-H2      | -0.48 | 0.18           | -2.72  | 0.0065023695 |
| BEAF-32 x Fs(1)h-L  | 0.36  | 0.09           | 4.07   | 4.786944E-05 | Su(Hw) x Chromator   | 3.39  | 0.13           | 25.15  | 1.39E-139    |
| BEAF-32 x Rad21     | 0.16  | 0.02           | 8.04   | 9.17094E-16  | Su(Hw) x CP190       | -1.78 | 0.04           | -45.96 | 0.00E+00     |
| dCTCF x dTFIIIC     | 2.28  | 0.20           | 11.64  | 2.72E-31     | Su(Hw) x Fs(1)h-L    | -1.82 | 0.13           | -13.76 | 4.47E-43     |
| dCTCF x GAF         | -0.56 | 0.07           | -8.02  | 1.09E-15     | Su(Hw) x Rad21       | 0.37  | 0.03           | 11.99  | 3.93E-33     |
| dCTCF x Su(Hw)      | 0.07  | 0.08           | 0.91   | 0.3604072864 | Barren x Cap-H2      | 0.78  | 0.08           | 10.34  | 4.43E-25     |
| dCTCF x Barren      | -0.14 | 0.14           | -1.02  | 0.3064835317 | Barren x Chromator   | 1.29  | 0.13           | 9.64   | 5.60E-22     |
| dCTCF x Cap-H2      | 1.34  | 0.18           | 7.29   | 3.185281E-13 | Barren x CP190       | 0.47  | 0.10           | 4.85   | 1.2130523695 |
| dCTCF x Chromator   | -0.03 | 0.14           | -0.19  | 0.8487729677 | Barren x Fs(1)h-L    | -0.01 | 0.11           | -0.12  | 9.01E-01     |
| dCTCF x CP190       | -0.87 | 0.06           | -15.65 | 3.17E-55     | Barren x Rad21       | 0.32  | 0.02           | 13.06  | 5.95E-39     |
| dCTCF x Fs(1)h-L    | -0.13 | 0.12           | -1.04  | 3.00E-01     | Cap-H2 x Chromator   | -0.15 | 0.15           | -1.03  | 3.04E-01     |
| dCTCF x Rad21       | -0.21 | 0.03           | -7.35  | 1.914592E-13 | Cap-H2 x CP190       | -0.19 | 0.12           | -1.65  | 9.88E-02     |
| dTFIIIC x GAF       | -0.68 | 0.07           | -9.13  | 6.90E-20     | Cap-H2 x Fs(1)h-L    | 0.21  | 0.17           | 1.24   | 2.14E-01     |
| dTFIIIC x Su(Hw)    | 2.77  | 0.18           | 15.40  | 1.61E-53     | Cap-H2 x Rad21       | -0.22 | 0.02           | -9.79  | 1.28E-22     |
| dTFIIIC x Barren    | -0.42 | 0.10           | -4.29  | 1.754691E-05 | Chromator x CP190    | -1.68 | 0.07           | -24.19 | 3.12E-129    |
| dTFIIIC x Cap-H2    | 0.70  | 0.15           | 4.67   | 3.04E-06     | Chromator x Fs(1)h-L | -0.28 | 0.19           | -1.50  | 0.1342403806 |
| dTFIIIC x Chromator | 0.29  | 0.20           | 1.47   | 1.42E-01     | Chromator x Rad21    | 0.33  | 0.04           | 8.19   | 2.60E-16     |
| dTFIIIC x CP190     | -2.33 | 0.11           | -21.46 | 4.10E-102    | CP190 x Fs(1)h-L     | -0.53 | 0.12           | -4.57  | 4.765758E-06 |
| dTFIIIC x Fs(1)h-L  | 0.87  | 0.14           | 6.11   | 9.78E-10     | CP190 x Rad21        | 0.43  | 0.02           | 17.85  | 3.13E-71     |
| dTFIIIC x Rad21     | -0.46 | 0.03           | -13.93 | 4.12E-44     | Fs(1)h-L x Rad21     | -0.20 | 0.01           | -21.33 | 6.40E-101    |
| GAF x Su(Hw)        | -0.12 | 0.07           | -1.69  | 0.0915101024 |                      |       |                |        |              |

Table S6: Second-order interaction betas of *Drosophila* insulator-binding proteins and cofactors learned using negative binomial regression.
